# Supplementary material for: Norcantharidin Enhances the Antitumor Effect of 5-Fluorouracil by Inducing Apoptosis of Cervical Cancer Cells: Network Pharmacology, Molecular Docking, and Experimental Validation
Source: MDPI journal article supplement (doi:10.3390/cimb46050242), 2024-04-25
Supplement: s1 [file s1]

| GENE    | Uniprot ID | PDB ID | $\Delta G$ (kcal/mol) |                |
|---------|------------|--------|-----------------------|----------------|
|         |            |        | 5-Fluorouracil        | norcantharidin |
| BCL2A1  | Q16548     | 6vo4   | -4.1                  | -5.2           |
| CA12    | O43570     | 5ll5   | -6.1                  | -6.9           |
| CASP9   | P55211     | 2ar9   | -5.5                  | -7.1           |
| CES1    | P23141     | 5a7g   | -5.2                  | -6.1           |
| CYP19A1 | P11511     | 3s79   | -5.1                  | -5.4           |
| CYP1A2  | P05177     | 2hi4   | -5.7                  | -6.2           |
| PTGS1   | P23219     | 6y3c   | -6.2                  | -6.8           |
| SIRT2   | Q8IXJ6     | 5y5n   | -5.0                  | -5.5           |

**Table S1.** Molecular docking results of 8 key expressed proteins.

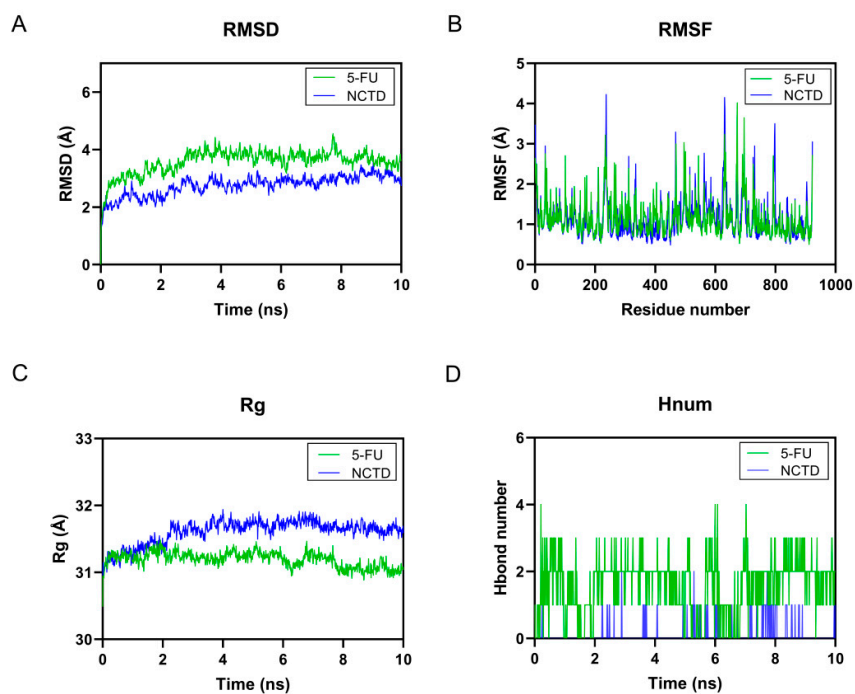

**Figure S1.** Molecular Dynamics Simulation results of caspase-9-5-FU complex and caspase-9-NCTD complex, respectively. (A) Root Mean Square Deviation. (B) Root Mean Square Fluctuation. (C) Radius of Gyration. (D) The number of hydrogen bonds.
